# Supplementary material for: Microbiological Characterization of Cutibacterium acnes Strains Isolated from Prosthetic Joint Infections
Source: MDPI journal article supplement (doi:10.3390/antibiotics11091260), 2022-09-16
Supplement: s1 [file s1]

**Table S1.** Clinical data regarding PJI *C. acnes* strains included in this study.

| Geographical origin    | Strain | Phylotype | SLST | Joint site | Age* | Gender | Immunosuppressed         |
|------------------------|--------|-----------|------|------------|------|--------|--------------------------|
| Slovenia               | ESL1   | H         | IB   | Hip        | 60   | Female | No                       |
| Slovenia               | ESL3   | H         | IB   | Hip        | 60   | Male   | No                       |
| Slovenia               | ESL4   | D         | IA   | Hip        | 77   | Male   | Solid tumor              |
| Slovenia               | ESL5   | H         | IB   | Knee       | 77   | Male   | No                       |
| Slovenia               | ESL8   | A         | IA   | Knee       | 59   | Male   | No                       |
| Slovenia               | ESL9   | H         | IB   | Hip        | 79   | Male   | No                       |
| Groningen, Netherlands | Hol 1  | D         | IA   | Shoulder   | 76   | Male   | No                       |
| Groningen, Netherlands | Hol 2  | D         | IA   | Shoulder   | 62   | Male   | No                       |
| Groningen, Netherlands | Hol 3  | D         | IA   | Knee       | 79   | Female | Hematological malignancy |
| Groningen, Netherlands | Hol 6  | D         | IA   | Hip        | 67   | Female | No                       |
| Groningen, Netherlands | Hol 8  | A         | IA   | Hip        | 65   | Male   | No                       |
| Groningen, Netherlands | Hol 9  | D         | IA   | Knee       | 73   | Male   | No                       |
| Barcelona, Spain       | BCN1   | C         | IA   | Hip        | 60   | Male   | Autoimmune disease       |
| Barcelona, Spain       | BCN2   | A         | IA   | Hip        | 79   | Female | No                       |
| Nantes, France         | N1     | A         | IA   | Shoulder   | 54   | Male   | No                       |
| Nantes, France         | N2     | H         | IB   | Hip        | 82   | Male   | No                       |

|                |     |   |    |          |    |        |             |
|----------------|-----|---|----|----------|----|--------|-------------|
| Nantes, France | N3  | H | IB | Hip      | 77 | Female | No          |
| Nantes, France | N4  | D | IA | Shoulder | 73 | Male   | No          |
| Nantes, France | N5  | A | IA | Shoulder | 34 | Male   | No          |
| Nantes, France | N6  | K | II | Shoulder | 64 | Male   | No          |
| Nantes, France | N7  | D | IA | Shoulder | 74 | Female | No          |
| Nantes, France | N8  | H | IB | Elbow    | 62 | Male   | No          |
| Nantes, France | N9  | D | IA | Shoulder | 63 | Male   | No          |
| Paris, France  | P1  | H | IB | Hip      | 45 | Male   | No          |
| Paris, France  | P3  | K | II | Hip      | 76 | Male   | Unkown      |
| Paris, France  | P4  | D | IA | Wrist    | 49 | Male   | Unkown      |
| Paris, France  | P5  | H | IB | Shoulder | 31 | Male   | No          |
| Paris, France  | P6  | D | IA | Hip      | 58 | Male   | Unknown     |
| Paris, France  | P7  | A | IA | Hip      | 72 | Male   | Solid tumor |
| Paris, France  | P8  | H | IB | Shoulder | 46 | Male   | Solid tumor |
| Paris, France  | P9  | E | IA | Hip      | 25 | Female | No          |
| Paris, France  | P10 | C | IA | Hip      | 52 | Female | No          |
| Paris, France  | P11 | H | IB | Knee     | 26 | Male   | No          |
| Paris, France  | P12 | K | II | Hip      | 25 | Male   | No          |

|               |     |   |    |          |    |        |             |
|---------------|-----|---|----|----------|----|--------|-------------|
| Paris, France | P14 | D | IA | Shoulder | 60 | Male   | No          |
| Paris, France | P15 | H | IB | Hip      | 79 | Male   | No          |
| Paris, France | P16 | A | IA | Knee     | 20 | Male   | Solid tumor |
| Paris, France | P17 | A | IA | Shoulder | 20 | Female | Solid tumor |
| Paris, France | P19 | K | II | Hip      | 39 | Male   | No          |
| Paris, France | P20 | F | IA | Hip      | 71 | Male   | No          |
| Paris, France | P21 | H | IB | Hip      | 81 | Male   | No          |
| Paris, France | P23 | D | IA | Hip      | 37 | Male   | No          |
| Paris, France | P24 | A | IA | Hip      | 75 | Female | No          |
| Paris, France | P25 | F | IA | Knee     | 25 | Male   | Solid tumor |
| Paris, France | P26 | K | II | Hip      | 57 | Male   | Unknown     |
| Paris, France | P28 | A | IA | Knee     | 43 | Male   | No          |
| Paris, France | P29 | K | II | Hip      | 50 | Male   | No          |
| Paris, France | P30 | H | IB | Hip      | 55 | Male   | Solid tumor |
| Paris, France | P31 | H | IB | Shoulder | 37 | Male   | No          |
| Paris, France | P32 | D | IA | Shoulder | 46 | Male   | No          |
| Paris, France | P33 | K | II | Hip      | 75 | Male   | No          |
| Paris, France | P34 | H | IB | Hip      | 55 | Male   | No          |

|                  |     |   |    |          |    |        |                      |
|------------------|-----|---|----|----------|----|--------|----------------------|
| Paris, France    | P35 | E | IA | Hip      | 35 | Male   | No                   |
| Paris, France    | P37 | H | IB | Shoulder | 66 | Male   | No                   |
| Paris, France    | P38 | F | IA | Shoulder | 70 | Male   | No                   |
| Zurich           | ZH1 | A | IA | Shoulder | 81 | Female | No                   |
| Zurich           | ZH2 | K | II | Shoulder | 74 | Male   | Solid tumor          |
| Zurich           | ZH3 | H | IB | Hip      | 76 | Male   | No                   |
| Zurich           | ZH4 | K | II | Hip      | 81 | Male   | No                   |
| Zurich           | ZH5 | H | IB | Shoulder | 80 | Male   | No                   |
| Zurich           | ZH6 | H | IB | Shoulder | 73 | Male   | No                   |
| Zurich           | ZH7 | H | IB | Hip      | 64 | Male   | No                   |
| Zurich           | ZH8 | C | IA | Hip      | 62 | Female | No                   |
| Santander, Spain | S1  | D | IA | Shoulder | 70 | Male   | No                   |
| Santander, Spain | S2  | K | II | Hip      | 76 | Female | No                   |
| Santander, Spain | S3  | H | IB | Shoulder | 62 | Male   | No                   |
| Santander, Spain | S4  | H | IB | Shoulder | 44 | Female | No                   |
| Santander, Spain | S5  | E | IA | Hip      | 53 | Male   | Metotrexatetreatment |
| Santander, Spain | S6  | A | IA | Shoulder | 44 | Female | No                   |
| Santander, Spain | S7  | H | IB | Hip      | 76 | Female | No                   |

|                  |     |   |    |          |    |        |    |
|------------------|-----|---|----|----------|----|--------|----|
| Santander, Spain | S8  | A | IA | Shoulder | 78 | Male   | No |
| Santander, Spain | S9  | H | IB | Hip      | 74 | Male   | No |
| Santander, Spain | S10 | A | IA | Hip      | 74 | Male   | No |
| Santander, Spain | S11 | A | IA | Shoulder | 60 | Male   | No |
| Santander, Spain | S12 | D | IA | Knee     | 67 | Female | No |
| Madrid, Spain    | 67  | K | II | Hip      | 77 | Female | No |
| Madrid, Spain    | 186 | H | IB | Hip      | 76 | Male   | No |
| Madrid, Spain    | 213 | D | IA | Knee     | 74 | Female | No |
| Madrid, Spain    | 261 | H | IB | Shoulder | 53 | Male   | No |

\*Age at the time of infection.
